# Supplementary material for: Cell-type-specific plasticity of inhibitory interneurons in the rehabilitation of auditory cortex after peripheral damage
Source: Springer Nature journal article supplement (doi:10.1038/s41467-023-39732-7), 2023-07-13
Supplement: MOESM1 [file 41467_2023_39732_MOESM1_ESM.pdf › 41467_2023_39732_MOESM1_ESM.pdf]

## Supplementary Information

**Title:** Cell-type-specific plasticity of inhibitory interneurons in the rehabilitation of auditory cortex after peripheral damage

**Authors:** Manoj Kumar<sup>1#</sup>, Gregory Handy<sup>2</sup>, Stylianos Kouvaros<sup>1</sup>, Yanjun Zhao<sup>1</sup>, Lovisa Ljungqvist Brinson<sup>1</sup>, Eric Wei<sup>1</sup>, Brandon Bizup<sup>1</sup>, Brent Doiron<sup>2</sup>, and Thanos Tzounopoulos<sup>1#</sup>

<sup>1</sup>Pittsburgh Hearing Research Center, Department of Otolaryngology, University of Pittsburgh, Pittsburgh, PA 15261.

<sup>2</sup>Departments of Neurobiology and Statistics, University of Chicago

# Correspondence: Thanos@pitt.edu (TT) or Mak328@pitt.edu (MK)

17 **Supplementary Table 1: Statistical detailed values for figure 1.**

18

| Figure | Comparison                    | Statistical test                                                                              | F, p                                                                                                          | N                               |
|--------|-------------------------------|-----------------------------------------------------------------------------------------------|---------------------------------------------------------------------------------------------------------------|---------------------------------|
| 1e     | Sham-Exposed vs Noise-exposed | 2-way ANOVA<br>Exposure x time interaction<br>Effect of Exposure                              | F =21.7, p = $2.8 \times 10^{-12}$<br>F= 221.3, p = $1.4 \times 10^{-34}$                                     | Noise: 35 mice<br>Sham: 19 mice |
| 1e     | Pre NE vs NE at 1, 3, 10 days | Holm-Bonferroni's post hoc<br>Pre NE vs NE day 1<br>Pre NE vs NE day 3<br>Pre NE vs NE day 10 | p = $5.8 \times 10^{-14}$<br>p = $1 \times 10^{-15}$<br>p = $5 \times 10^{-9}$                                | 35 mice                         |
| 1e     | Pre SE vs SE at 1, 3, 10 days | Holm-Bonferroni's post hoc<br>Pre SE vs SE day 1<br>Pre SE vs SE day 3<br>Pre SE vs SE day 10 | p > 0.99<br>p > 0.99<br>p > 0.99                                                                              | 19 mice                         |
| 1f     | Sound-Intensity vs Time       | 2-way ANOVA<br>Intensity x time interaction<br>Effect of Intensity<br>Effect of Time          | F =61.6, p < $1 \times 10^{-15}$<br>F= 115.5, p < $1 \times 10^{-15}$<br>F = 98.19, p = $2.0 \times 10^{-14}$ | 35 mice                         |
| 1g     | Sham-Exposed vs Noise-exposed | 2-way ANOVA<br>Exposure x time interaction<br>Effect of Exposure                              | F =15.25, p = $9.4 \times 10^{-9}$<br>F= 56.4, p = $7.0 \times 10^{-10}$                                      | Noise: 35 mice<br>Sham: 19 mice |
| 1g     | Pre NE vs NE at 1, 3, 10 days | Holm-Bonferroni's post hoc<br>Pre NE vs NE day 1<br>Pre NE vs NE day 3<br>Pre NE vs NE day 10 | p = $1.9 \times 10^{-14}$<br>p = $5.3 \times 10^{-9}$<br>p = $2.5 \times 10^{-6}$                             | 35 mice                         |
| 1g     | Pre SE vs SE at 1, 3, 10 days | Holm-Bonferroni's post hoc<br>Pre SE vs SE day 1<br>Pre SE vs SE day 3<br>Pre SE vs SE day 10 | p > 0.99<br>p > 0.99<br>p = 0.38                                                                              | 19 mice                         |
| 1h     | Sham-Exposed vs Noise-exposed | 2-way ANOVA<br>Exposure x time interaction<br>Effect of Exposure                              | F =8.4, p = $5.9 \times 10^{-5}$<br>F= 11.6, p = $1.9 \times 10^{-3}$                                         | Noise: 20 mice<br>Sham: 10 mice |
| 1h     | Pre NE vs NE at 1, 3, 10 days | Holm-Bonferroni's post hoc<br>Pre NE vs NE day 1<br>Pre NE vs NE day 3<br>Pre NE vs NE day 10 | p = $7.2 \times 10^{-5}$<br>p = $1.1 \times 10^{-4}$<br>p = $4.8 \times 10^{-4}$                              | 20 mice                         |
| 1h     | Pre SE vs SE at 1, 3, 10 days | Holm-Bonferroni's post hoc<br>Pre SE vs SE day 1<br>Pre SE vs SE day 3<br>Pre SE vs SE day 10 | p = 0.13<br>p > 0.99<br>p = 0.92                                                                              | 10 mice                         |
| 1i     | Sham-Exposed vs Noise-exposed | 2-way ANOVA<br>Exposure x time interaction<br>Effect of Exposure                              | F =13.2, p = $3.7 \times 10^{-7}$<br>F= 21.8, p = $6.7 \times 10^{-5}$                                        | Noise: 20 mice<br>Sham: 10 mice |
| 1i     | Pre NE vs NE at 1, 3, 10 days | Holm-Bonferroni's post hoc<br>Pre NE vs NE day 1<br>Pre NE vs NE day 3<br>Pre NE vs NE day 10 | p = $7.3 \times 10^{-8}$<br>p = $2.6 \times 10^{-4}$<br>p = $1.3 \times 10^{-3}$                              | 20 mice                         |
| 1i     | Pre SE vs SE at 1, 3, 10 days | Holm-Bonferroni's post hoc<br>Pre SE vs SE day 1<br>Pre SE vs SE day 3<br>Pre SE vs SE day 10 | p = 0.53<br>p > 0.99<br>p > 0.99                                                                              | 10 mice                         |
| 1j     | Sham-Exposed vs Noise-exposed | 2-way ANOVA<br>Exposure x time interaction<br>Effect of Exposure                              | F =16.4, p = $1.6 \times 10^{-8}$<br>F= 8.8, p = $6.0 \times 10^{-3}$                                         | Noise: 20 mice<br>Sham: 10 mice |
| 1j     | Pre NE vs NE at 1, 3, 10 days | Holm-Bonferroni's post hoc<br>Pre NE vs NE day 1<br>Pre NE vs NE day 3<br>Pre NE vs NE day 10 | p = $8.3 \times 10^{-9}$<br>p = $2.4 \times 10^{-6}$<br>p = $9.3 \times 10^{-8}$                              | 20 mice                         |
| 1j     | Pre SE vs SE at 1, 3, 10 days | Holm-Bonferroni's post hoc                                                                    |                                                                                                               | 10 mice                         |

|    |                               |                                                                                               |                                                                                                 |                               |
|----|-------------------------------|-----------------------------------------------------------------------------------------------|-------------------------------------------------------------------------------------------------|-------------------------------|
|    |                               | Pre SE vs SE day 1<br>Pre SE vs SE day 3<br>Pre SE vs SE day 10                               | $p = 0.92$<br>$p > 0.99$<br>$p > 0.66$                                                          |                               |
| 1k | Sham-Exposed vs Noise-exposed | 2-way ANOVA<br>Exposure x time interaction<br>Effect of Exposure                              | $F = 17.0, p = 2.8 \times 10^{-9}$<br>$F = 67.9, p = 1.0 \times 10^{-10}$                       | Noise: 5 mice<br>Sham: 4 mice |
| 1k | Pre NE vs NE at 1, 3, 10 days | Holm-Bonferroni's post hoc<br>Pre NE vs NE day 1<br>Pre NE vs NE day 3<br>Pre NE vs NE day 10 | $p = 8.0 \times 10^{-10}$<br>$p = 3.0 \times 10^{-8}$<br>$p = 5.6 \times 10^{-12}$              | 5 mice                        |
| 1k | Pre SE vs SE at 1, 3, 10 days | Holm-Bonferroni's post hoc<br>Pre SE vs SE day 1<br>Pre SE vs SE day 3<br>Pre SE vs SE day 10 | $p = 0.07$<br>$p > 0.99$<br>$p > 0.99$                                                          | 4 mice                        |
| 1m | Sham-Exposed vs Noise-exposed | 2-way ANOVA<br>Exposure x Frequency interaction<br>Effect of Exposure                         | $F = 24.2, p = 1.1 \times 10^{-9}$<br>$F = 126.2, p = 3.6 \times 10^{-13}$                      | Noise: 5 mice<br>Sham: 4 mice |
| 1m | Sham-Exposed vs Noise-exposed | Holm-Bonferroni's post hoc<br>8 kHz<br>12 kHz<br>16 kHz<br>24 kHz<br>32 kHz                   | $p > 0.99$<br>$p = 0.47$<br>$p = 0.01$<br>$p = 1.6 \times 10^{-8}$<br>$p = 6.8 \times 10^{-13}$ | Noise: 5 mice<br>Sham: 4 mice |

19

20

21

22

23

24

25

26

27 **Supplementary Table 2: Statistical detailed values for figure 2.**

28

| Figure | Comparison                    | Statistical test                                                                                                                    | F, p                                                                                                            | N                                                                                       |
|--------|-------------------------------|-------------------------------------------------------------------------------------------------------------------------------------|-----------------------------------------------------------------------------------------------------------------|-----------------------------------------------------------------------------------------|
| 2d     | Sham-Exposed vs Noise-exposed | Mixed model ANOVA<br>Exposure x time interaction<br>Effect of Exposure                                                              | $F = 30.4, p = 4.3 \times 10^{-9}$<br>$F = 63.5, p = 3.8 \times 10^{-6}$                                        | Noise: Pre: 11 mice, d1: 8 mice, d3: 10 mice, and d10: 8 mice<br>Sham: 3 mice           |
| 2d     | Pre NE vs NE at 1, 3, 10 days | Holm-Bonferroni's post hoc<br>Pre NE vs NE day 1<br>Pre NE vs NE day 3<br>Pre NE vs NE day 10                                       | $p < 1 \times 10^{-15}$<br>$p = 2.6 \times 10^{-11}$<br>$p = 0.002$                                             | Pre: 11 mice, d1: 8 mice, d3: 10 mice, and d10: 8 mice 8-11 mice                        |
| 2d     | Pre SE vs SE at 1, 3, 10 days | Holm-Bonferroni's post hoc<br>Pre SE vs SE day 1<br>Pre SE vs SE day 3<br>Pre SE vs SE day 10                                       | $p > 0.99$<br>$p > 0.99$<br>$p > 0.99$                                                                          | 3 mice                                                                                  |
| 2e     | Sound-Intensity vs Time       | Mixed-Model ANOVA<br>Intensity x time interaction<br>Effect of Intensity<br>Effect of Time                                          | $F = 5.06, p = 1.2 \times 10^{-13}$<br>$F = 53.41, p < 1 \times 10^{-15}$<br>$F = 66.18, p < 1 \times 10^{-15}$ | Pre: 11 mice, d1: 8 mice, d3: 10 mice, and d10: 8 mice                                  |
| 2e     | Pre NE vs NE at 1, 3, 10 days | Holm-Bonferroni's post hoc<br>Pre NE vs NE day 1<br>Pre NE vs NE day 3<br>Pre NE vs NE day 10<br>Pre-NE vs. NE-day10 (75 and 80 dB) | $p = 2.8 \times 10^{-5}$<br>$p = 0.007$<br>$p > 0.99$<br>$p < 0.04$                                             | Pre: 11 mice, d1: 8 mice, d3: 10 mice, and d10: 8 mice                                  |
| 2f     | Sham-Exposed vs Noise-exposed | Mixed model ANOVA<br>Exposure x time interaction<br>Effect of Exposure                                                              | $F = 5.1, p = 5.5 \times 10^{-3}$<br>$F = 20.31, p = 7.1 \times 10^{-4}$                                        | Noise: Pre: 11 mice, d1: 8 mice, d3: 10 mice, and d10: 8 mice 8-11 mice<br>Sham: 3 mice |
| 2f     | Pre NE vs NE at 1, 3, 10 days | Holm-Bonferroni's post hoc<br>Pre NE vs NE day 1<br>Pre NE vs NE day 3<br>Pre NE vs NE day 10                                       | $p = 0.005$<br>$p = 0.001$<br>$p = 0.01$                                                                        | Pre: 11 mice, d1: 8 mice, d3: 10 mice, and d10: 8 mice                                  |
| 2f     | Pre SE vs SE at 1, 3, 10 days | Holm-Bonferroni's post hoc<br>Pre SE vs SE day 1<br>Pre SE vs SE day 3<br>Pre SE vs SE day 10                                       | $p > 0.99$<br>$p > 0.99$<br>$p > 0.99$                                                                          | 3 mice                                                                                  |
| 2k     | Sham-Exposed vs Noise-exposed | 2-way ANOVA<br>Exposure x time interaction<br>Effect of Exposure                                                                    | $F = 12.4, p = 5.0 \times 10^{-8}$<br>$F = 11.6, p = 6.9 \times 10^{-4}$                                        | Noise: 358 PNs<br>Sham: 218 PNs                                                         |
| 2k     | Pre NE vs NE at 1, 3, 10 days | Holm-Bonferroni's post hoc<br>Pre NE vs NE day 1<br>Pre NE vs NE day 3<br>Pre NE vs NE day 10                                       | $p = 2.0 \times 10^{-10}$<br>$p = 4.0 \times 10^{-4}$<br>$p > 0.99$                                             | 358 PNs                                                                                 |
| 2k     | Pre SE vs SE at 1, 3, 10 days | Holm-Bonferroni's post hoc<br>Pre SE vs SE day 1<br>Pre SE vs SE day 3<br>Pre SE vs SE day 10                                       | $p > 0.99$<br>$p > 0.99$<br>$p > 0.99$                                                                          | 218 PNs                                                                                 |
| 2l     | Effect of Noise-exposure      | Friedman Test<br>Pre NE vs NE day 1<br>Pre NE vs NE day 3<br>Pre NE vs NE day 10                                                    | 11.95, 0.007<br>$p = 0.003$<br>$p = 0.18$<br>$p > 0.99$                                                         | 218 PNs                                                                                 |
| 2m     | Sound-Intensity vs Time       | 2-way ANOVA<br>Intensity x time interaction<br>Effect of Intensity<br>Effect of Time                                                | $F = 1.46, p = 0.057$<br>$F = 20.6, p < 1 \times 10^{-15}$<br>$F = 12.5, p = 5.3 \times 10^{-7}$                | 218 PNs                                                                                 |

|            |                               |                                                                                               |                                                                                                               |                                 |
|------------|-------------------------------|-----------------------------------------------------------------------------------------------|---------------------------------------------------------------------------------------------------------------|---------------------------------|
| 2m         | Pre NE vs NE at 1, 3, 10 days | Holm-Bonferroni's post hoc<br>Pre NE vs NE day 1<br>Pre NE vs NE day 3<br>Pre NE vs NE day 10 | $p = 0.016$<br>$p = 0.80$<br>$p = 0.001$                                                                      | 218 PNs                         |
| 2n         | Sham-Exposed vs Noise-exposed | 2-way ANOVA<br>Exposure x time interaction<br>Effect of Exposure                              | $F = 4.7, p = 0.002$<br>$F = 23.3, p = 1.7 \times 10^{-6}$                                                    | Noise: 358 PNs<br>Sham: 218 PNs |
| 2n         | Pre NE vs NE at 1, 3, 10 days | Holm-Bonferroni's post hoc<br>Pre NE vs NE day 1<br>Pre NE vs NE day 3<br>Pre NE vs NE day 10 | $p = 2.0 \times 10^{-11}$<br>$p = 1.0 \times 10^{-9}$<br>$p = 2.3 \times 10^{-12}$                            | 358 PNs                         |
| 2n         | Pre SE vs SE at 1, 3, 10 days | Holm-Bonferroni's post hoc<br>Pre SE vs SE day 1<br>Pre SE vs SE day 3<br>Pre SE vs SE day 10 | $p > 0.99$<br>$p > 0.13$<br>$p > 0.64$                                                                        | 218 PNs                         |
| 2o         | Effect of Noise-exposure      | Friedman Test<br>Pre NE vs NE day 1<br>Pre NE vs NE day 3<br>Pre NE vs NE day 10              | 10.31, 0.01<br>$p = 0.003$<br>$p = 0.03$<br>$p = 0.01$                                                        | 218 PNs                         |
| 2q, left   | Effect of Noise-exposure      | 1-way RM ANOVA<br>Pre NE vs NE day 1<br>Pre NE vs NE day 3<br>Pre NE vs NE day 10             | 12.18, $1.0 \times 10^{-6}$<br>$p = 3.6 \times 10^{-5}$<br>$p = 0.02$<br>$p = 0.43$                           | 175 PNs                         |
| 2q, middle | Effect of Noise-exposure      | 1-way RM ANOVA<br>Pre NE vs NE day 1<br>Pre NE vs NE day 3<br>Pre NE vs NE day 10             | 5.3, $1.0 \times 10^{-3}$<br>$p = 0.001$<br>$p = 0.012$<br>$p = 0.79$                                         | 110 PNs                         |
| 2q, high   | Effect of Noise-exposure      | 1-way RM ANOVA<br>Pre NE vs NE day 1<br>Pre NE vs NE day 3<br>Pre NE vs NE day 10             | 6.6, 0.0003<br>$p = 3.9 \times 10^{-5}$<br>$p = 0.001$<br>$p = 0.02$                                          | 47 PNs                          |
| 2r, left   | Effect of Noise-exposure      | 1-way RM ANOVA<br>Pre NE vs NE day 1<br>Pre NE vs NE day 3<br>Pre NE vs NE day 10             | 9.6, $3.0 \times 10^{-5}$<br>$p = 6.3 \times 10^{-7}$<br>$p = 1.3 \times 10^{-5}$<br>$p = 1.1 \times 10^{-4}$ | 175 PNs                         |
| 2r, middle | Effect of Noise-exposure      | 1-way RM ANOVA<br>Pre NE vs NE day 1<br>Pre NE vs NE day 3<br>Pre NE vs NE day 10             | 4.5, 0.01<br>$p = 2.1 \times 10^{-4}$<br>$p = 0.01$<br>$p = 0.007$                                            | 110 PNs                         |
| 2r, high   | Effect of Noise-exposure      | 1-way RM ANOVA<br>Pre NE vs NE day 1<br>Pre NE vs NE day 3<br>Pre NE vs NE day 10             | 4.14, 0.01<br>$p = 9.8 \times 10^{-4}$<br>$p = 1.4 \times 10^{-3}$<br>$p = 0.02$                              | 47 PNs                          |

29

30

31

32

33

34

35

36

**Supplementary Table 3: Default parameter values.**

| Parameter          | Value              | Description                                           |
|--------------------|--------------------|-------------------------------------------------------|
| $\tau_m$           | 10 (ms)            | membrane time constant                                |
| $\tau_s$           | 0.5 (ms)           | synaptic time constant                                |
| $\tau_r$           | 2 (ms)             | refractory period                                     |
| $E_L$              | -65 (mV)           | resting potential                                     |
| $V_{th}$           | -50 (mV)           | spike threshold                                       |
| $V_r$              | -65 (mV)           | reset potential                                       |
| $w$                | 0.6 (mV)           | synaptic strength of the excitatory connection        |
| $g$                | 3                  | the synaptic factor for inhibitory connection         |
| $N_e$              | 5000               | Num. of PNs                                           |
| $N_p$              | 520                | Num. of PV neurons                                    |
| $N_s$              | 520                | Num. SOM neurons                                      |
| $N_v$              | 0 / 520            | Num. VIP neurons (3/4 populations)                    |
| $N_{ext}^e$        | 500                | Num. external inputs to PNs                           |
| $N_{ext}^p$        | 400                | Num. external inputs to PV neurons                    |
| $N_{ext}^s$        | 0                  | Num. external inputs to SOM neurons                   |
| $N_{ext}^v$        | -- / 400           | Num. external inputs to VIP neurons (3/4 populations) |
| $\sigma_{fixed}^2$ | 10                 | Fixed background noise level                          |
| $r_{bg}^a$         | 3 (Hz)             | Background excitatory firing rate                     |
| $r_{stim}^a$       | 0, 2, 4, or 8 (Hz) | Stimulus firing rate (none, low, med, high)           |
| $\gamma$           | 0.5                | Damage to background firing rate                      |
| $\beta^a$          | [0.05, 0.5]        | Damage to input stimulus firing rate to pop $a$       |
| $I_{recov}^a$      | [-5, 5]            | Recovery current to pop $a$                           |
| $\kappa_{thres}$   | -0.7               | Stability threshold                                   |

**Supplement Table 4: The probability of a connection between presynaptic (columns) and postsynaptic (rows) populations.**

|     | E    | PV   | SOM  | VIP  |
|-----|------|------|------|------|
| E   | 0.03 | 0.10 | 0.10 | 0    |
| PV  | 0.05 | 0.10 | 0.07 | 0    |
| SOM | 0.05 | 0    | 0    | 0.10 |
| VIP | 0.05 | 0.15 | 0.05 | 0    |

45 **Supplementary Table 5: Statistical detailed values for figure 4.**  
46

| Figure | Comparison                    | Statistical test                                                                              | F, p                                                                                                       | N                                                                           |
|--------|-------------------------------|-----------------------------------------------------------------------------------------------|------------------------------------------------------------------------------------------------------------|-----------------------------------------------------------------------------|
| 4d     | Sham-Exposed vs Noise-exposed | Mixed model ANOVA<br>Exposure x time interaction<br>Effect of Exposure                        | F =22.4, p = $2.8 \times 10^{-7}$<br>F= 89.0, p = $1.0 \times 10^{-9}$                                     | Noise: Pre: 6 mice, d1: 5 mice, d3: 5 mice, and d10: 5 mice<br>Sham: 3 mice |
| 4d     | Pre NE vs NE at 1, 3, 10 days | Holm-Bonferroni's post hoc<br>Pre NE vs NE day 1<br>Pre NE vs NE day 3<br>Pre NE vs NE day 10 | p = $3.4 \times 10^{-12}$<br>p < $4.6 \times 10^{-4}$<br>p = 0.001                                         | Pre: 6 mice, d1: 5 mice, d3: 5 mice, and d10: 5 mice                        |
| 4d     | Pre SE vs SE at 1, 3, 10 days | Holm-Bonferroni's post hoc<br>Pre SE vs SE day 1<br>Pre SE vs SE day 3<br>Pre SE vs SE day 10 | p > 0.99<br>p > 0.99<br>p > 0.99                                                                           | 3 mice                                                                      |
| 4e     | Sound-Intensity vs Time       | Mixed-Model ANOVA<br>Intensity x time interaction<br>Effect of Intensity<br>Effect of Time    | F = 2.9, p = $3.3 \times 10^{-4}$<br>F= 16.8, p < $1 \times 10^{-15}$<br>F = 98.5, p < $1 \times 10^{-15}$ | Pre: 6 mice, d1: 5 mice, d3: 5 mice, and d10: 5 mice                        |
| 4e     | Pre NE vs NE at 1, 3, 10 days | Holm-Bonferroni's post hoc<br>Pre NE vs NE day 1<br>Pre NE vs NE day 3<br>Pre NE vs NE day 10 | p < $1.0 \times 10^{-15}$<br>p = $4.5 \times 10^{-8}$<br>p = 0.11                                          | Pre: 6 mice, d1: 5 mice, d3: 5 mice, and d10: 5 mice                        |
| 4f     | Sham-Exposed vs Noise-exposed | Mixed model ANOVA<br>Exposure x time interaction<br>Effect of Exposure                        | F =7.4, p = $9.6 \times 10^{-4}$<br>F= 53.7, p = $1.1 \times 10^{-7}$                                      | Noise: Pre: 6 mice, d1: 5 mice, d3: 5 mice, and d10: 5 mice<br>Sham: 3 mice |
| 4f     | Pre NE vs NE at 1, 3, 10 days | Holm-Bonferroni's post hoc<br>Pre NE vs NE day 1<br>Pre NE vs NE day 3<br>Pre NE vs NE day 10 | p = $4.8 \times 10^{-6}$<br>p = $6.6 \times 10^{-3}$<br>p = $2.2 \times 10^{-6}$                           | Pre: 6 mice, d1: 5 mice, d3: 5 mice, and d10: 5 mice<br>5-6 mice            |
| 4f     | Pre SE vs SE at 1, 3, 10 days | Holm-Bonferroni's post hoc<br>Pre SE vs SE day 1<br>Pre SE vs SE day 3<br>Pre SE vs SE day 10 | p > 0.99<br>p > 0.99<br>p > 0.99                                                                           | 3 mice                                                                      |
| 4k     | Sham-Exposed vs Noise-exposed | 2-way ANOVA<br>Exposure x time interaction<br>Effect of Exposure                              | F =7.3, p = $8.5 \times 10^{-5}$<br>F= 11.1, p = 0.001                                                     | Noise: 82 PVs<br>Sham: 80 PVs                                               |
| 4k     | Pre NE vs NE at 1, 3, 10 days | Holm-Bonferroni's post hoc<br>Pre NE vs NE day 1<br>Pre NE vs NE day 3<br>Pre NE vs NE day 10 | p = $4.9 \times 10^{-6}$<br>p = $5.0 \times 10^{-4}$<br>p > 0.99                                           | 82 PVs                                                                      |
| 4k     | Pre SE vs SE at 1, 3, 10 days | Holm-Bonferroni's post hoc<br>Pre SE vs SE day 1<br>Pre SE vs SE day 3<br>Pre SE vs SE day 10 | p > 0.99<br>p > 0.99<br>p > 0.99                                                                           | 80 PVs                                                                      |
| 4l     | Effect of Noise-exposure      | Friedman Test<br>Pre NE vs NE day 1<br>Pre NE vs NE day 3<br>Pre NE vs NE day 10              | 11.5, 0.003<br>p = 0.005<br>p = 0.003<br>p = 0.14                                                          | 82 PVs                                                                      |
| 4m     | Sound-Intensity vs Time       | 2-way ANOVA<br>Intensity x time interaction<br>Effect of Intensity<br>Effect of Time          | F = 2.2, p = 0.00034<br>F= 15.7, p < $1 \times 10^{-10}$<br>F = 29.8, p < $1 \times 10^{-10}$              | 82 PVs                                                                      |
| 4m     | Pre NE vs NE at 1, 3, 10 days | Holm-Bonferroni's post hoc<br>Pre NE vs NE day 1<br>Pre NE vs NE day 3<br>Pre NE vs NE day 10 | p = 0.016<br>p = 0.80<br>p = 0.001                                                                         | 82 PVs                                                                      |

|            |                               |                                                                                               |                                                                                                               |                               |
|------------|-------------------------------|-----------------------------------------------------------------------------------------------|---------------------------------------------------------------------------------------------------------------|-------------------------------|
| 4n         | Sham-Exposed vs Noise-exposed | 2-way ANOVA<br>Exposure x time interaction<br>Effect of Exposure                              | F =10.19, p = $1.6 \times 10^{-6}$<br>F= 26.9, p = $6.1 \times 10^{-7}$                                       | Noise: 82 PVs<br>Sham: 80 PVs |
| 4n         | Pre NE vs NE at 1, 3, 10 days | Holm-Bonferroni's post hoc<br>Pre NE vs NE day 1<br>Pre NE vs NE day 3<br>Pre NE vs NE day 10 | p = $1.6 \times 10^{-9}$<br>p < $1.0 \times 10^{-15}$<br>p = $5.2 \times 10^{-7}$                             | 82 PVs                        |
| 4n         | Pre SE vs SE at 1, 3, 10 days | Holm-Bonferroni's post hoc<br>Pre SE vs SE day 1<br>Pre SE vs SE day 3<br>Pre SE vs SE day 10 | p > 0.99<br>p > 0.13<br>p > 0.64                                                                              | 80 PVs                        |
| 4o         | Effect of Noise-exposure      | Friedman Test<br>Pre NE vs NE day 1<br>Pre NE vs NE day 3<br>Pre NE vs NE day 10              | 12.2, 0.002<br>p = 0.003<br>p = 0.001<br>p = 0.04                                                             | 82 PVs                        |
| 4q, left   | Effect of Noise-exposure      | 1-way RM ANOVA<br>Pre NE vs NE day 1<br>Pre NE vs NE day 3<br>Pre NE vs NE day 10             | 12.47, $4.1 \times 10^{-7}$<br>p = $5.3 \times 10^{-8}$<br>p = 0.005<br>p = 0.17                              | 39 PVs                        |
| 4q, middle | Effect of Noise-exposure      | 1-way RM ANOVA<br>Pre NE vs NE day 1<br>Pre NE vs NE day 3<br>Pre NE vs NE day 10             | 4.3, 0.007<br>p = 0.04<br>p = 0.0009<br>p = 0.34                                                              | 24 PVs                        |
| 4q, high   | Effect of Noise-exposure      | 1-way RM ANOVA<br>Pre NE vs NE day 1<br>Pre NE vs NE day 3<br>Pre NE vs NE day 10             | 2.8, 0.002<br>p = 0.02<br>p = 0.05<br>p = 0.72                                                                | 18 PVs                        |
| 4r, left   | Effect of Noise-exposure      | 1-way RM ANOVA<br>Pre NE vs NE day 1<br>Pre NE vs NE day 3<br>Pre NE vs NE day 10             | 8.8, $2.0 \times 10^{-5}$<br>p = $1.0 \times 10^{-5}$<br>p = $3.5 \times 10^{-5}$<br>p = $6.0 \times 10^{-3}$ | 39 PVs                        |
| 4r, middle | Effect of Noise-exposure      | 1-way RM ANOVA<br>Pre NE vs NE day 1<br>Pre NE vs NE day 3<br>Pre NE vs NE day 10             | 7.4, 0.0002<br>p = 0.02<br>p = $1.4 \times 10^{-5}$<br>p = 0.01                                               | 24 PVs                        |
| 4r, high   | Effect of Noise-exposure      | 1-way RM ANOVA<br>Pre NE vs NE day 1<br>Pre NE vs NE day 3<br>Pre NE vs NE day 10             | 3.06, 0.03<br>p = 0.006<br>p = 0.03<br>p = 0.006                                                              | 18 PVs                        |



**Supplementary Table 6: Statistical detailed values for figure 5.**

| Figure     | Comparison                    | Statistical test                                                                              | F, p                                                                                                        | N                                                                           |
|------------|-------------------------------|-----------------------------------------------------------------------------------------------|-------------------------------------------------------------------------------------------------------------|-----------------------------------------------------------------------------|
| 5d         | Sham-Exposed vs Noise-exposed | Mixed model ANOVA<br>Exposure x time interaction<br>Effect of Exposure                        | $F = 81.34, p = 1.6 \times 10^{-14}$<br>$F = 682.0, p < 1.0 \times 10^{-15}$                                | Noise: Pre: 6 mice, d1: 3 mice, d3: 7 mice, and d10: 6 mice<br>Sham: 4 mice |
| 5d         | Pre NE vs NE at 1, 3, 10 days | Holm-Bonferroni's post hoc<br>Pre NE vs NE day 1<br>Pre NE vs NE day 3<br>Pre NE vs NE day 10 | $p < 1 \times 10^{-15}$<br>$p < 1 \times 10^{-15}$<br>$p < 1 \times 10^{-15}$                               | Pre: 6 mice, d1: 3 mice, d3: 7 mice, and d10: 6 mice                        |
| 5d         | Pre SE vs SE at 1, 3, 10 days | Holm-Bonferroni's post hoc<br>Pre SE vs SE day 1<br>Pre SE vs SE day 3<br>Pre SE vs SE day 10 | $p > 0.99$<br>$p > 0.99$<br>$p > 0.99$                                                                      | 4 mice                                                                      |
| 5e         | Sound-Intensity vs Time       | Mixed-Model ANOVA<br>Intensity x time interaction<br>Effect of Intensity<br>Effect of Time    | $F = 2.8, p = 2.3 \times 10^{-5}$<br>$F = 6.7, p = 4.0 \times 10^{-6}$<br>$F = 82.9, p < 1 \times 10^{-10}$ | Pre: 6 mice, d1: 3 mice, d3: 7 mice, and d10: 6 mice<br>5-6 mice            |
| 5e         | Pre NE vs NE at 1, 3, 10 days | Holm-Bonferroni's post hoc<br>Pre NE vs NE day 1<br>Pre NE vs NE day 3<br>Pre NE vs NE day 10 | $p < 1.0 \times 10^{-15}$<br>$p < 1.0 \times 10^{-15}$<br>$p < 1.0 \times 10^{-15}$                         | Pre: 6 mice, d1: 3 mice, d3: 7 mice, and d10: 6 mice<br>5-6 mice            |
| 5f         | Sham-Exposed vs Noise-exposed | Mixed model ANOVA<br>Exposure x time interaction<br>Effect of Exposure                        | $F = 2.1, p = 0.12$<br>$F = 0.38, p = 0.54$                                                                 | Noise: Pre: 6 mice, d1: 3 mice, d3: 7 mice, and d10: 6 mice<br>Sham: 4 mice |
| 5k         | Sham-Exposed vs Noise-exposed | 2-way ANOVA<br>Exposure x time interaction<br>Effect of Exposure                              | $F = 5.3, p = 0.001$<br>$F = 16.6, p = 8.2 \times 10^{-5}$                                                  | Noise: 82 SOMs<br>Sham: 42 SOMs                                             |
| 5k         | Pre NE vs NE at 1, 3, 10 days | Holm-Bonferroni's post hoc<br>Pre NE vs NE day 1<br>Pre NE vs NE day 3<br>Pre NE vs NE day 10 | $p = 0.0005$<br>$p = 0.0002$<br>$p = 0.03$                                                                  | 82 SOMs                                                                     |
| 5k         | Pre SE vs SE at 1, 3, 10 days | Holm-Bonferroni's post hoc<br>Pre SE vs SE day 1<br>Pre SE vs SE day 3<br>Pre SE vs SE day 10 | $p > 0.99$<br>$p > 0.99$<br>$p = 0.37$                                                                      | 42 SOMs                                                                     |
| 5l         | Effect of Noise-exposure      | RM on-way ANOVA<br>Pre NE vs NE day 1<br>Pre NE vs NE day 3<br>Pre NE vs NE day 10            | 11.0, 0.00005<br>$p = 0.005$<br>$p = 0.005$<br>$p = 0.18$                                                   | 82 SOMs                                                                     |
| 5m         | Sound-Intensity vs Time       | 2-way ANOVA<br>Intensity x time interaction<br>Effect of Intensity<br>Effect of Time          | $F = 1.6, p = 0.02$<br>$F = 31.04, p < 1 \times 10^{-15}$<br>$F = 45.9, p < 1 \times 10^{-15}$              | 82 SOMs                                                                     |
| 5m         | Pre NE vs NE at 1, 3, 10 days | Holm-Bonferroni's post hoc<br>Pre NE vs NE day 1<br>Pre NE vs NE day 3<br>Pre NE vs NE day 10 | $p < 1.0 \times 10^{-15}$<br>$p < 1.0 \times 10^{-15}$<br>$p = 5.4 \times 10^{-12}$                         | 82 SOMs                                                                     |
| 5n         | Sham-Exposed vs Noise-exposed | 2-way ANOVA<br>Exposure x time interaction<br>Effect of Exposure                              | $F = 0.28, p = 0.83$<br>$F = 1.2, p = 0.27$                                                                 | Noise: 82 SOMs<br>Sham: 42 PVs                                              |
| 5o         | Effect of Noise-exposure      | RM one-way ANOVA                                                                              | 1.4, 0.24                                                                                                   | 82 SOMs                                                                     |
| 5q, left   | Effect of Noise-exposure      | 1-way RM ANOVA<br>Pre NE vs NE day 1<br>Pre NE vs NE day 3<br>Pre NE vs NE day 10             | 4.2, 0.007<br>$p = 0.01$<br>$p = 0.001$<br>$p = 0.01$                                                       | 31 SOMs                                                                     |
| 5q, middle | Effect of Noise-exposure      | 1-way RM ANOVA<br>Pre NE vs NE day 1<br>Pre NE vs NE day 3                                    | 3.36, 0.001<br>$p = 0.01$<br>$p = 0.04$                                                                     | 34 SOMs                                                                     |

|             |                          |                                                                                   |                                                |         |
|-------------|--------------------------|-----------------------------------------------------------------------------------|------------------------------------------------|---------|
|             |                          | Pre NE vs NE day 10                                                               | p = 0.28                                       |         |
| 5q,<br>high | Effect of Noise-exposure | 1-way RM ANOVA<br>Pre NE vs NE day 1<br>Pre NE vs NE day 3<br>Pre NE vs NE day 10 | 3.5, 0.005<br>p = 0.02<br>p = 0.03<br>p = 0.23 | 15 SOMs |
| 5r, left    | Effect of Noise-exposure | 1-way RM ANOVA                                                                    | 2.3, 0.08                                      | 31 SOMs |
| 5r, middle  | Effect of Noise-exposure | 1-way RM ANOVA                                                                    | 2.4, 0.06                                      | 34 SOMs |
| 5r, high    | Effect of Noise-exposure | 1-way RM ANOVA                                                                    | 1.2, 0.31                                      | 15 SOMs |

**Supplementary Table 7: Statistical detailed values for figure 6.**

| Figure | Comparison                    | Statistical test                                                       | F, p                                   | Neurons(mice)                                                     |
|--------|-------------------------------|------------------------------------------------------------------------|----------------------------------------|-------------------------------------------------------------------|
| 6d     | Sham-Exposed vs Noise-exposed | Mixed model ANOVA<br>Exposure x time interaction<br>Effect of Exposure | F =2.0, p = 0.16<br>F= 0.89, p = 0.34  | SEday1: 20 (3); SEday10: 20 (3)<br>NEday:1 19 (3); NEday10: 20(3) |
| 6e     | Sham-Exposed vs Noise-exposed | Mixed model ANOVA<br>Exposure x time interaction<br>Effect of Exposure | F =1.6, p = 0.20<br>F= 0.07, p = 0.78  | SEday1: 20 (3); SEday10: 20 (3)<br>NEday:1 19 (3); NEday10: 20(3) |
| 6g     | Sham-Exposed vs Noise-exposed | Mixed model ANOVA<br>Exposure x time interaction<br>Effect of Exposure | F =0.09, p = 0.76<br>F= 2.6, p = 0.11  | SEday1: 20 (3); SEday10: 20 (3)<br>NEday:1 19 (3); NEday10: 20(3) |
| 6h     | Sham-Exposed vs Noise-exposed | Mixed model ANOVA<br>Exposure x time interaction<br>Effect of Exposure | F =1.5, p = 0.22<br>F= 0.02, p = 0.86  | SEday1: 20 (3); SEday10: 20 (3)<br>NEday:1 19 (3); NEday10: 20(3) |
| 6m     | Sham-Exposed vs Noise-exposed | Mixed model ANOVA<br>Exposure x time interaction<br>Effect of Exposure | F =3.04, p = 0.08<br>F= 0.42, p = 0.51 | SEday1: 20 (3); SEday10: 20 (3)<br>NEday:1 19 (3); NEday10: 20(3) |

**Supplementary Table 8: Statistical detailed values for figure 8.**

| Figure | Comparison                    | Statistical test                                                                              | F, p                                                                                           | N                                                                           |
|--------|-------------------------------|-----------------------------------------------------------------------------------------------|------------------------------------------------------------------------------------------------|-----------------------------------------------------------------------------|
| 8d     | Sham-Exposed vs Noise-exposed | Mixed model ANOVA<br>Exposure x time interaction<br>Effect of Exposure                        | F = 8.8, p = 0.0003<br>F = 34.6, p = $3.3 \times 10^{-6}$                                      | Noise: Pre: 6 mice, d1: 6 mice, d3: 6 mice, and d10: 4 mice<br>Sham: 3 mice |
| 8d     | Pre NE vs NE at 1, 3, 10 days | Holm-Bonferroni's post hoc<br>Pre NE vs NE day 1<br>Pre NE vs NE day 3<br>Pre NE vs NE day 10 | p = $6.2 \times 10^{-8}$<br>p = $2.0 \times 10^{-4}$<br>p > 0.99                               | Pre: 6 mice, d1: 6 mice, d3: 6 mice, and d10: 4 mice                        |
| 8d     | Pre SE vs SE at 1, 3, 10 days | Holm-Bonferroni's post hoc<br>Pre SE vs SE day 1<br>Pre SE vs SE day 3<br>Pre SE vs SE day 10 | p > 0.99<br>p > 0.99<br>p > 0.99                                                               | 3 mice                                                                      |
| 8e     | Sound-Intensity vs Time       | Mixed-Model ANOVA<br>Intensity x time interaction<br>Effect of Intensity<br>Effect of Time    | F = 1.02, p = 0.44<br>F = 22.8, p < $1 \times 10^{-15}$<br>F = 29.6, p = $8.1 \times 10^{-11}$ | Pre: 6 mice, d1: 6 mice, d3: 6 mice, and d10: 4 mice                        |
| 8e     | Pre NE vs NE at 1, 3, 10 days | Holm-Bonferroni's post hoc<br>Pre NE vs NE day 1<br>Pre NE vs NE day 3<br>Pre NE vs NE day 10 | p = $5.2 \times 10^{-7}$<br>p = 0.86<br>p = 0.0002                                             | Pre: 6 mice, d1: 6 mice, d3: 6 mice, and d10: 4 mice                        |
| 8f     | Sham-Exposed vs Noise-exposed | Mixed model ANOVA<br>Exposure x time interaction<br>Effect of Exposure                        | F = 3.1, p = 0.04<br>F = 13.5, p = 0.007                                                       | Noise: Pre: 6 mice, d1: 6 mice, d3: 6 mice, and d10: 4 mice<br>Sham: 3 mice |
| 8f     | Pre NE vs NE at 1, 3, 10 days | Holm-Bonferroni's post hoc<br>Pre NE vs NE day 1<br>Pre NE vs NE day 3<br>Pre NE vs NE day 10 | p = 0.14<br>p = 0.02<br>p = 0.11                                                               | Pre: 6 mice, d1: 6 mice, d3: 6 mice, and d10: 4 mice                        |
| 8f     | Pre SE vs SE at 1, 3, 10 days | Holm-Bonferroni's post hoc<br>Pre SE vs SE day 1<br>Pre SE vs SE day 3<br>Pre SE vs SE day 10 | p > 0.99<br>p > 0.99<br>p > 0.99                                                               | 3 mice                                                                      |
| 8k     | Sham-Exposed vs Noise-exposed | 2-way ANOVA<br>Exposure x time interaction<br>Effect of Exposure                              | F = 4.7, p = 0.002<br>F = 6.9, p = 0.001                                                       | Noise: 70 VIPs<br>Sham: 60 VIPs                                             |
| 8k     | Pre NE vs NE at 1, 3, 10 days | Holm-Bonferroni's post hoc<br>Pre NE vs NE day 1<br>Pre NE vs NE day 3<br>Pre NE vs NE day 10 | p = 0.01<br>p = 0.01<br>p = $1.0 \times 10^{-5}$                                               | 70 VIPs                                                                     |
| 8k     | Pre SE vs SE at 1, 3, 10 days | Holm-Bonferroni's post hoc<br>Pre SE vs SE day 1<br>Pre SE vs SE day 3<br>Pre SE vs SE day 10 | p > 0.99<br>p > 0.99<br>p = 0.78                                                               | 60 VIPs                                                                     |
| 8l     | Effect of Noise-exposure      | One-way RM ANOVA<br>Pre NE vs NE day 1<br>Pre NE vs NE day 3<br>Pre NE vs NE day 10           | 8.3, 0.001<br>p = 0.03<br>p = 0.01<br>p > 0.99                                                 | 70 VIPs                                                                     |
| 8m     | Sound-Intensity vs Time       | 2-way ANOVA<br>Intensity x time interaction<br>Effect of Intensity<br>Effect of Time          | F = 2.6, p = 0.00001<br>F = 12.1, p < $1 \times 10^{-15}$<br>F = 39.9, p < $1 \times 10^{-15}$ | 70 VIPs                                                                     |
| 8m     | Pre NE vs NE at 1, 3, 10 days | Holm-Bonferroni's post hoc<br>Pre NE vs NE day 1<br>Pre NE vs NE day 3<br>Pre NE vs NE day 10 | p = $5.1 \times 10^{-8}$<br>p = 0.004<br>p = $1.1 \times 10^{-5}$                              | 70 VIPs                                                                     |

|            |                               |                                                                                               |                                                   |                                 |
|------------|-------------------------------|-----------------------------------------------------------------------------------------------|---------------------------------------------------|---------------------------------|
| 8n         | Sham-Exposed vs Noise-exposed | 2-way ANOVA<br>Exposure x time interaction<br>Effect of Exposure                              | F =4.72, p = 0.002<br>F= 13.7, p = 0.001          | Noise: 70 VIPs<br>Sham: 60 VIPs |
| 8n         | Pre NE vs NE at 1, 3, 10 days | Holm-Bonferroni's post hoc<br>Pre NE vs NE day 1<br>Pre NE vs NE day 3<br>Pre NE vs NE day 10 | p = 0.01<br>p =0.01<br>p = 1.0 x 10 <sup>-5</sup> | 70 VIPs                         |
| 8n         | Pre SE vs SE at 1, 3, 10 days | Holm-Bonferroni's post hoc<br>Pre SE vs SE day 1<br>Pre SE vs SE day 3<br>Pre SE vs SE day 10 | p > 0.99<br>p > 0.99<br>p > 0.78                  | 60 VIPs                         |
| 8o         | Effect of Noise-exposure      | Friedman test<br>Pre NE vs NE day 1<br>Pre NE vs NE day 3<br>Pre NE vs NE day 10              | 9.4, 0.02<br>p = 0.56<br>p = 0.25<br>p = 0.007    | 70 VIPs                         |
| 8q, left   | Effect of Noise-exposure      | 1-way RM ANOVA<br>Pre NE vs NE day 1<br>Pre NE vs NE day 3<br>Pre NE vs NE day 10             | 4.9, 0.003<br>p = 0.007<br>p = 0.01<br>p = 0.78   | 33 VIPs                         |
| 8q, middle | Effect of Noise-exposure      | 1-way RM ANOVA<br>Pre NE vs NE day 1<br>Pre NE vs NE day 3<br>Pre NE vs NE day 10             | 2.1, 0.01<br>p = 0.01<br>p = 0.72<br>p = 0.91     | 18 VIPs                         |
| 8q, high   | Effect of Noise-exposure      | 1-way RM ANOVA<br>Pre NE vs NE day 1<br>Pre NE vs NE day 3<br>Pre NE vs NE day 10             | 3.7, 0.002<br>p = 0.05<br>p = 0.01<br>p = 0.04    | 17 VIPs                         |
| 8r, left   | Effect of Noise-exposure      | 1-way RM ANOVA<br>Pre NE vs NE day 1<br>Pre NE vs NE day 3<br>Pre NE vs NE day 10             | 6.4, 0.009<br>p = 0.01<br>p = 0.008<br>p = 0.004  | 33 VIPs                         |
| 8r, middle | Effect of Noise-exposure      | 1-way RM ANOVA<br>Pre NE vs NE day 1<br>Pre NE vs NE day 3<br>Pre NE vs NE day 10             | 2.8, 0.04<br>p = 0.62<br>p = 0.82<br>p = 0.01     | 18 VIPs                         |
| 8r, high   | Effect of Noise-exposure      | 1-way RM ANOVA<br>Pre NE vs NE day 1<br>Pre NE vs NE day 3<br>Pre NE vs NE day 10             | 6.1, 0.002<br>p = 0.02<br>p = 0.03<br>p = 0.001   | 17 VIPs                         |

95  
96  
97  
98  
99  
100  
101  
102  
103  
104  
105  
106  
107  
108  
109  
110  
111  
112  
113  
114

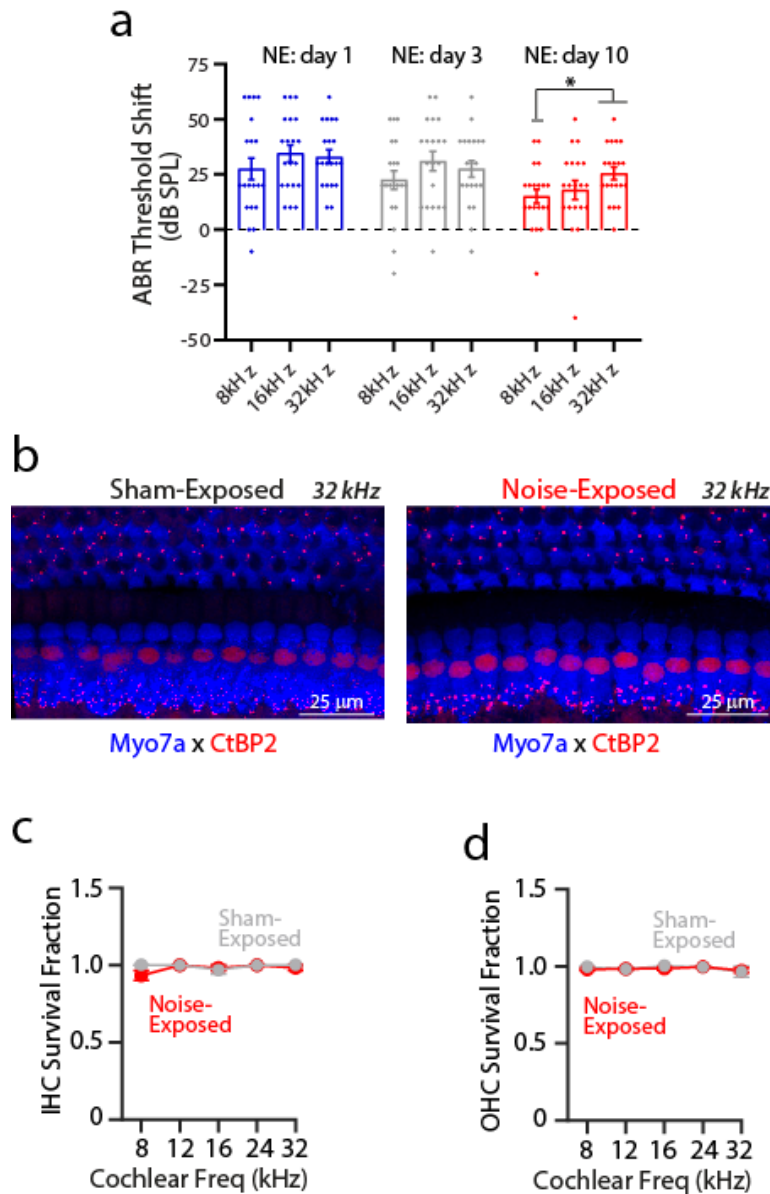

Supplementary Figure 1

**Supplementary Figure 1. Noise-trauma increased the ABR thresholds for 8-32 kHz tones but did not affect either IHC or OHC survival. (a)** Average ABR threshold shift to 8, 12, 16 kHz tones after NIHL. (n = 20 mice, Frequency vs. time: 2-way ANOVA; effect of frequency,  $F = 12.5$ ,  $p = 6.4 \times 10^{-5}$ ; \*,  $p = 2.5 \times 10^{-5}$ , 32kHz vs 8 kHz, Holm-Bonferroni's post hoc). **(b)** Representative images of OHCs from the 32 kHz region of sham- (left) and noise- (right) exposed mice. **(c)** Quantification of IHC survival from sham- (grey) and noise- (red) exposed mice. (Noise: 5 mice vs. sham: 4 mice, 2-way ANOVA; exposure x frequency,  $F = 1.89$ ,  $p = 0.13$ ; effect of exposure,  $F = 2.7$ ,  $p = 0.10$ ). **(d)** Quantification of OHC survival from sham- (grey) and noise- (red) exposed mice. (Noise: 5 mice vs. sham: 4 mice, 2-way ANOVA; exposure x frequency,  $F = 0.26$ ,  $p = 0.89$ ; effect of exposure,  $F = 0.81$ ,  $p = 0.37$ ).

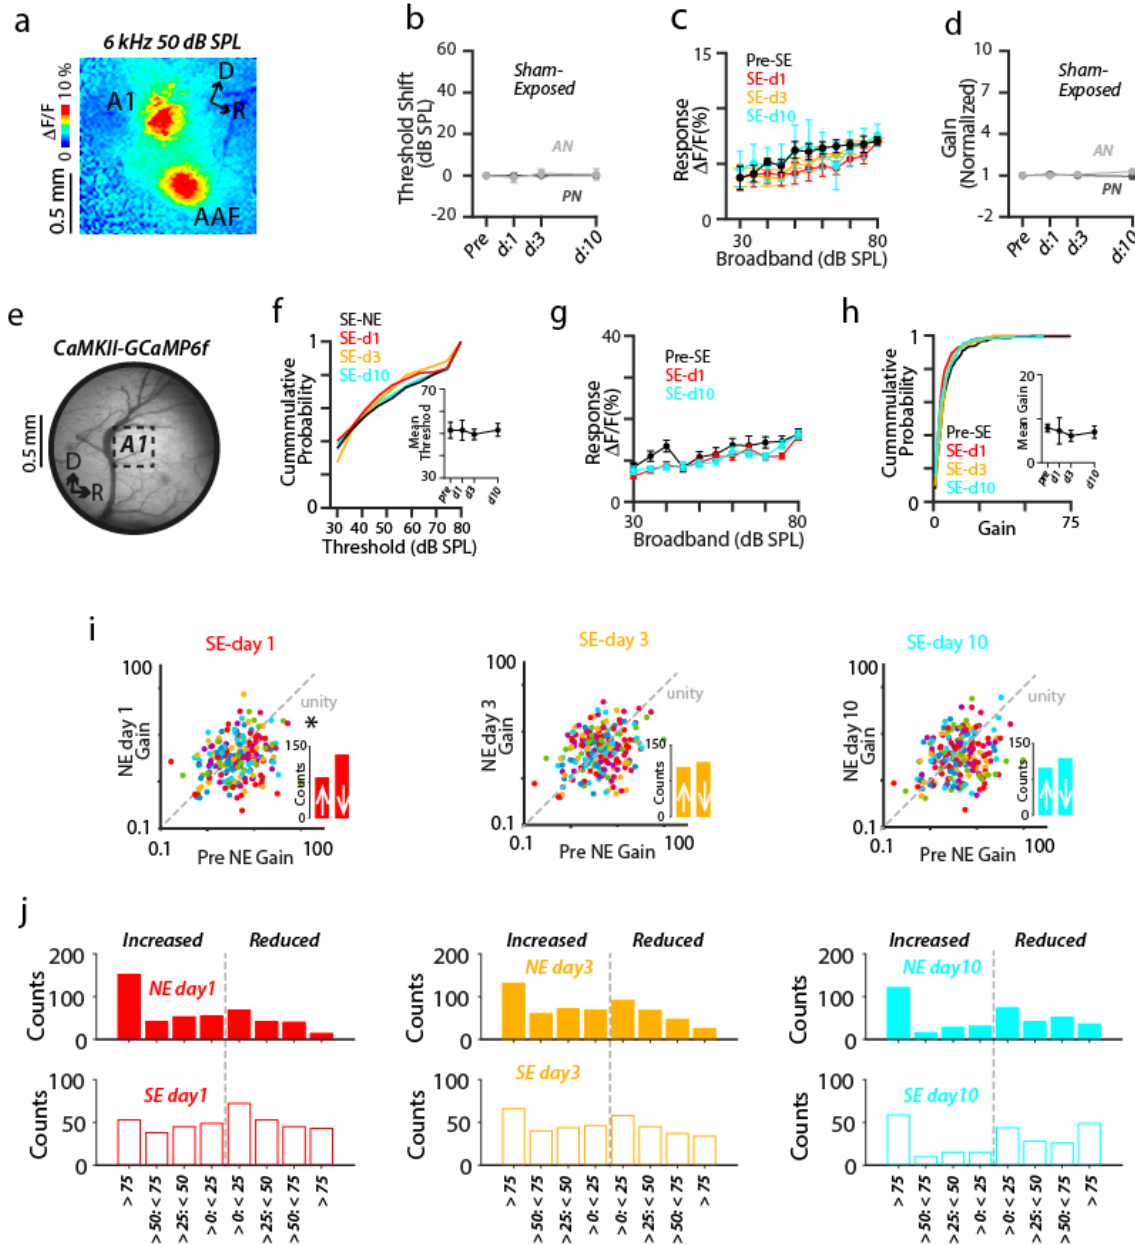

Supplementary Figure 2

**Supplementary Figure 2. Sham exposure does not alter the sound-evoked activity of A1 L2/3 PNs.** (a) Localization of A1. A 6 kHz 50 dB SPL tone triggered GCaMP6s fluorescence responses in two regions of the auditory cortex representing A1 and the anterior auditory field (AAF; D stands dorsal and R for rostral). (b) Average change in response thresholds of A1 PNs (dark grey) at 1, 3, and 10 days after sham exposure. (n = 3 mice, 1-way repeated measure ANOVA,  $F = 0$ ,  $p > 0.99$ ). Average change in AN threshold (light grey) reproduced from **Figure 1**. (c) Average responses of A1 PNs to broadband sounds from sham-exposed mice. (n = 3 mice, 2-way ANOVA; time x sound level interaction,  $F = 1.3$ ,  $p = 0.35$ ; effect of time,  $F = 0.54$ ,  $p = 0.56$ ). (d) Average response gain of A1 PNs (dark grey) normalized to pre-sham-exposed gain after sham exposure at 1, 3, and 10 days. (n = 3 mice, 1-way repeated measure ANOVA,  $F = 1.3$ ,  $p = 0.34$ ). Normalized AN gain (light grey) reproduced from **Figure 1**. (e). Implantation of cranial glass

139 window over A1. **(f)** Cumulative probability of response threshold of A1 L2/3 PNs before and after  
140 sham exposure. Inset: Average mean threshold of PNs per mouse (218 PNs from 5 mice, 1-way  
141 repeated measure ANOVA,  $F = 0.17$ ,  $p = 0.87$ ). **(g)** Average sound-evoked responses of A1 L2/3  
142 individual PNs to broadband sounds from sham-exposed mice. (218 PNs from 5 mice, 2-way  
143 ANOVA; sound intensity and time interaction,  $F = 1.6$ ,  $p = 0.072$ ; effect of time,  $F = 2.9$ ,  $p = 0.065$ ).  
144 **(h)** Cumulative probability of gain of A1 L2/3 PNs before and after sham exposure. Inset: Average  
145 mean gain of PNs per mouse (218 PNs from 5 mice, 1-way repeated measure ANOVA,  $F = 0.29$ ,  
146  $p = 0.71$ ). **(i)** Scatter plots of the gain of individual A1 L2/3 PNs before and after sham exposure.  
147 Dotted line represents unity. Insets: Bar graphs representing the number of neurons showing  
148 increased gain ( $\uparrow$  above unity) and reduced gain ( $\downarrow$  below unity) after NIHL. PreSE vs. SEday1:  
149  $p = 0.006$ , PreSE vs. SEday3:  $p = 0.11$ , and PreSE vs. SEday10:  $p = 0.06$ ; permutation test. **(j)**  
150 Histograms showing percentage changes in the gain of L2/3 PNs after noise (top) and sham  
151 (bottom) exposure.  
152

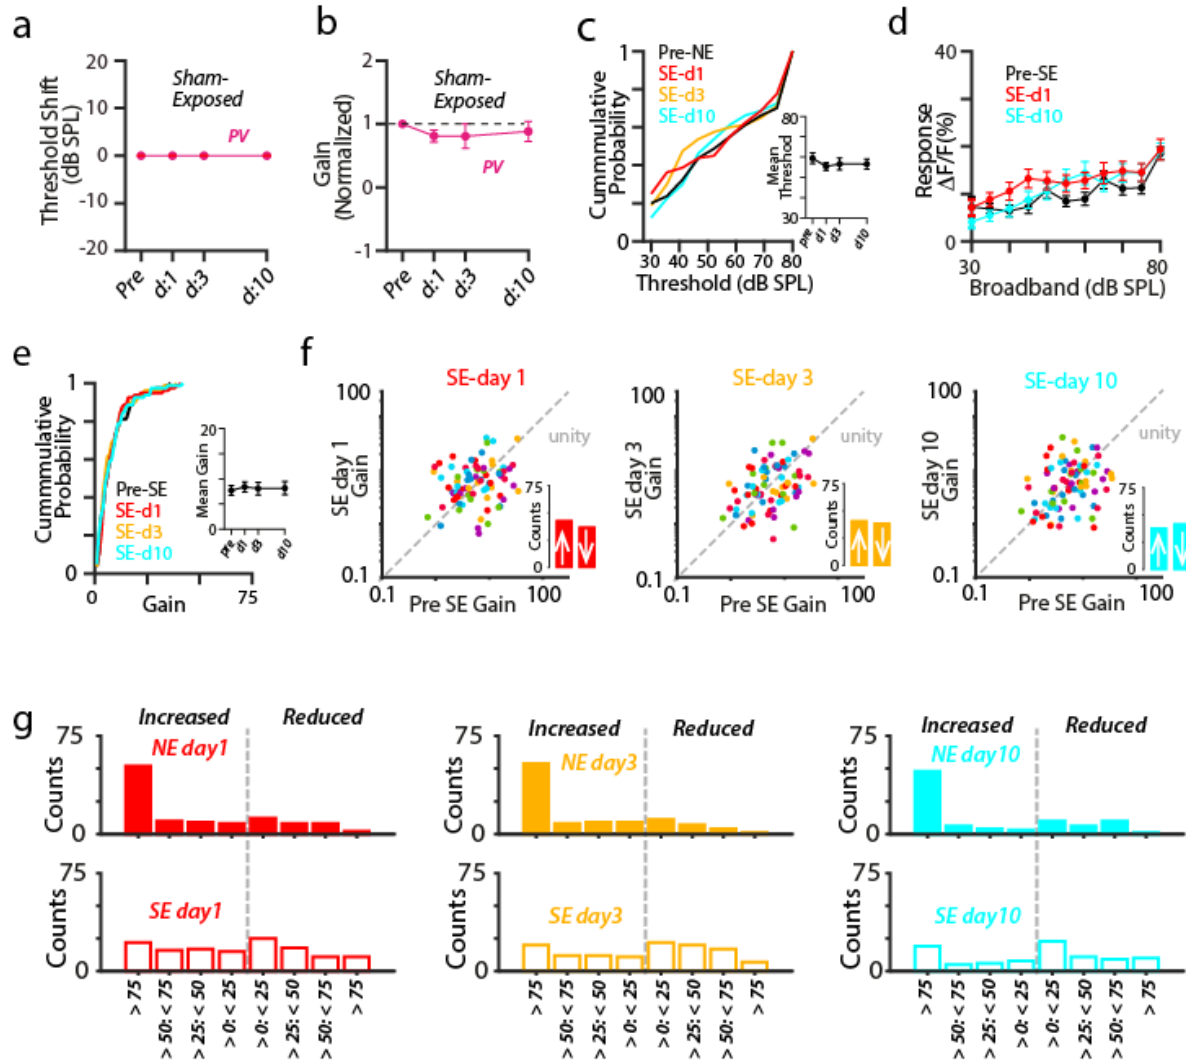

Supplementary Figure 3

**Supplementary Figure 3. Sham exposure does not alter the sound-evoked activity of A1 L2/3 PVs.** (a) Average change in response thresholds of A1 PVs neurons at 1, 3, and 10 days after sham exposure. ( $n = 3$  mice, 1-way repeated measure ANOVA,  $F = 0$ ,  $p > 0.99$ ). (b) Average response gain of A1 PVs normalized to pre-sham-exposed gain after sham exposure at 1, 3, and 10 days. ( $n = 3$  mice, 1-way repeated measure ANOVA,  $F = 1.09$ ,  $p = 0.40$ ). (c) Cumulative probability of response threshold of A1 L2/3 PV neurons before and after sham-exposure. Inset: Average mean threshold of PVs per mouse (80 neurons from 7 mice, 1-way repeated measure ANOVA,  $F = 0.79$ ,  $p = 0.46$ ). (d) Average responses of A1 L2/3 individual PVs to broadband sounds from sham-exposed mice. (80 neurons from 7 mice, 2-way ANOVA; sound intensity and time interaction,  $F = 1.3$ ,  $p = 0.16$ ; effect of time,  $F = 1.6$ ,  $p = 0.16$ ). (e) Cumulative gain of A1 L2/3 PVs before and after sham exposure. Inset: Average mean gain of PV neurons per mouse (80 neurons from 7 mice, 1-way repeated measure ANOVA,  $F = 0.14$ ,  $p = 0.86$ ). (f) Scatter plots of the gain of individual A1 L2/3 PVs neurons before and after sham exposure. Dotted line represents unity. Insets: Bar graphs represent the number of neurons showing increased gain ( $\uparrow$  above unity) and reduced gain ( $\downarrow$  below unity) after NIHL. PreSE vs. SEday1:  $p = 0.98$ , PreSE vs. SEday3:  $p = 0.67$ , and PreSE vs. SEday10:  $p = 0.96$ ; permutation test. (g) Histograms showing percentage changes in the gain of PVs after noise (top) and sham (bottom) exposure.



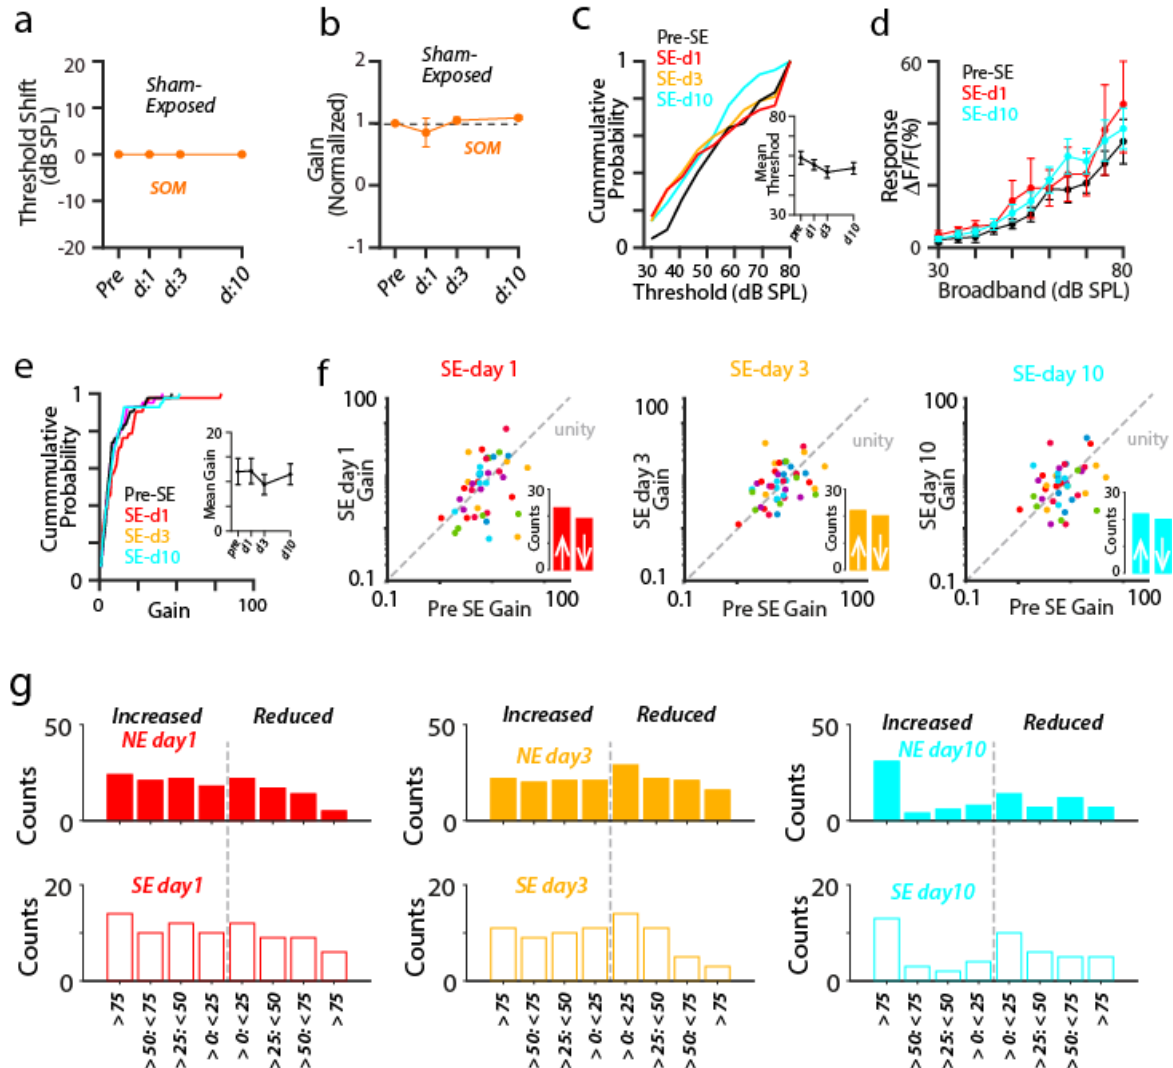

Supplementary Figure 4

**Supplementary Figure 4. Sham exposure did not alter the sound-evoked activity of A1 L2/3 SOMs.** (a) Average change in response thresholds of A1 SOMs at 1, 3, and 10 days after sham exposure. ( $n = 4$  mice, 1-way repeated measure ANOVA,  $F = 0$ ,  $p > 0.99$ ). (b) Average response gain of A1 SOMs normalized to pre-sham-exposed gain after sham exposure at 1, 3, and 10 days. ( $n = 4$  mice, 1-way repeated measure ANOVA,  $F = 0.85$ ,  $p = 0.42$ ). (c) Cumulative probability of response threshold of A1 L2/3 SOMs before and after sham exposure. Inset: Average threshold of SOMs per mouse (42 neurons from 9 mice, 1-way repeated measure ANOVA,  $F = 1.1$ ,  $p = 0.33$ ). (d) Average responses of A1 L2/3 individual SOMs to broadband sounds from sham-exposed mice. (42 neurons from 9 mice, 2-way ANOVA; sound intensity and time interaction,  $F = 0.92$ ,  $p = 0.43$ ; effect of time,  $F = 0.62$ ,  $p = 0.49$ ). (e) Cumulative probability of gain of A1 L2/3 SOMs neurons before and after sham exposure. Inset: Average gain of SOMs per mouse (42 neurons from 9 mice, 1-way repeated measure ANOVA,  $F = 0.35$ ,  $p = 0.70$ ). (f) Scatter plots of the gain of individual A1 L2/3 SOMs before and after sham exposure. Dotted line represents unity. Insets: Bar graphs representing the number of neurons showing increased gain ( $\uparrow$  above unity) and reduced gain ( $\downarrow$  below unity) after NIHL. PreSE vs. SEday1:  $p = 0.55$ , PreSE vs. SEday3:  $p = 0.94$ , and PreSE vs. SEday10:  $p = 0.89$ ; permutation test. (g) Histograms showing percentage changes in the gain of L2/3 SOMs after noise (top) and sham (bottom) exposure.

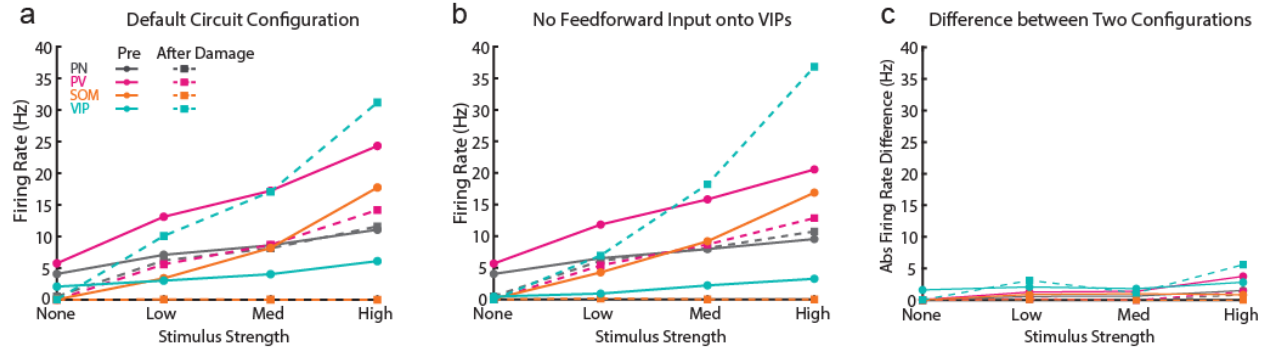

Supplementary Figure 5

**Supplementary Figure 5. Direct stimulus input onto VIPs can be captured by short-term facilitation from recurrent PN connections.** (a) Example viable parameter set showing all population firing rates for the pre-damage (solid lines with dots) and recovered (dashed lines with squares) states using the default network configuration illustrated in Figure 7a. (b) Same parameter regime as (a), except the direct stimulus input on VIPs was removed and short-term facilitation from PNs was added. Short-term facilitation was modeled by increasing the connection strength of PN→VIP (i.e.,  $w_{VIP,PN}$ ) as a function of the PN firing rate ( $w_{VIP,PN}$  varied from 0.6 to 1.3 as the stimulus strength varied from none to high). Other parameter values can be found in Tables 1 and 2. (c) The absolute firing rate difference between the model used in panels (a) and (b).

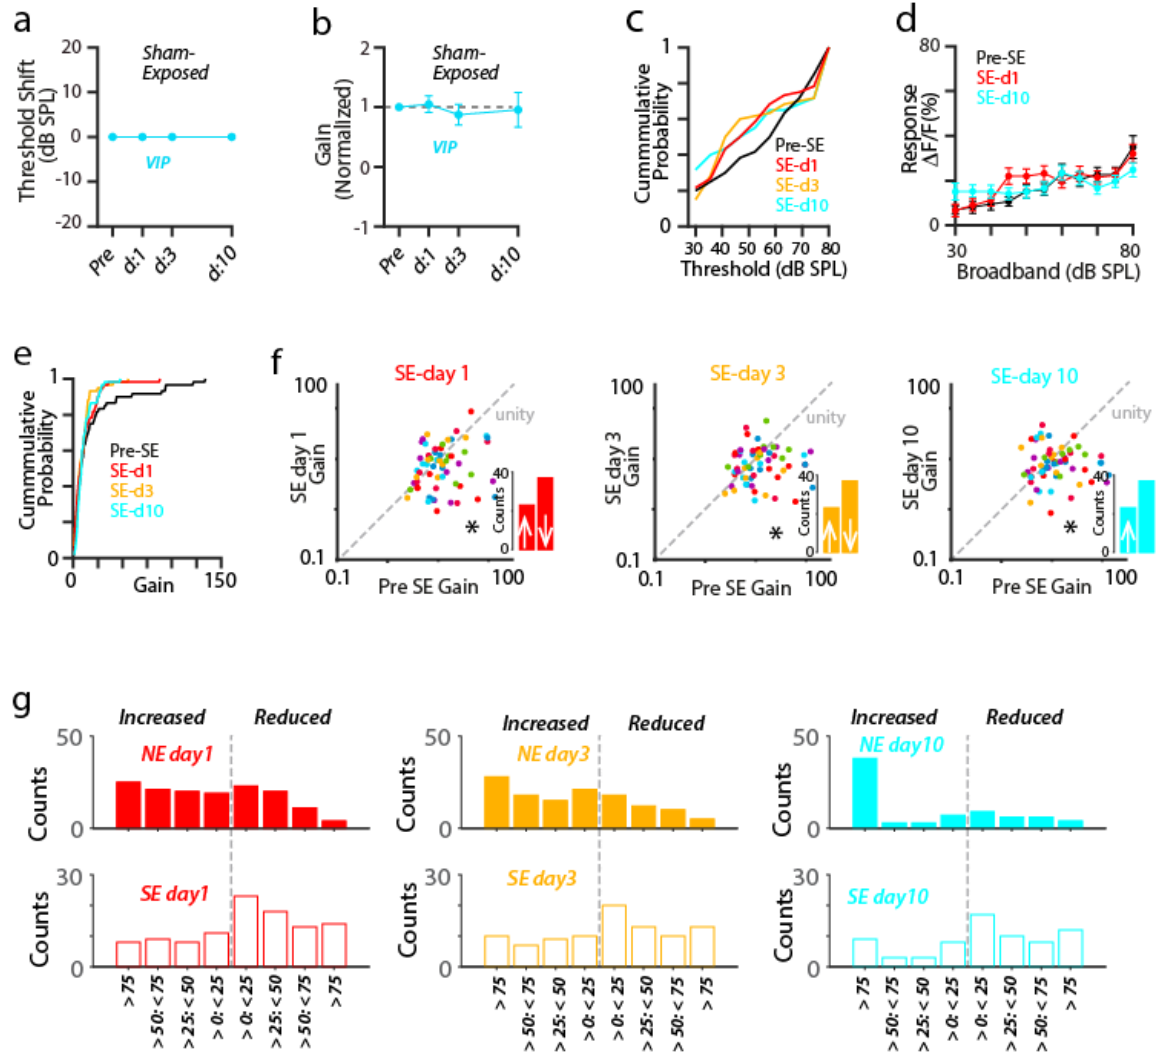

Supplementary Figure 6

**Supplementary Figure 6. Sham exposure reduced the gain of A1 L2/3 VIPs.** (a) Average change in response thresholds of A1 VIPs at 1, 3, and 10 days after sham exposure. (n = 3 mice, 1-way repeated measure ANOVA,  $F = 0$ ,  $p > 0.99$ ). (b) Average response gain of A1 VIPs normalized to pre-sham-exposed gain after sham exposure at 1, 3, and 10 days. (n = 3 mice, 1-way repeated measure ANOVA,  $F = 0.03$ ,  $p = 0.98$ ). (c) Cumulative probability of response threshold of A1 L2/3 VIPs before and after sham-exposure. Inset: Average mean threshold of VIP neurons per mouse (60 neurons from 6 mice, 1-way repeated measure ANOVA,  $F = 0.52$ ,  $p = 0.62$ ). (d) Average responses of A1 L2/3 individual VIPs to broadband sounds from sham-exposed mice. (60 neurons from 6 mice, 2-way ANOVA; sound intensity and time interaction,  $F = 4.5$ ,  $p = 0.01$ ; effect of time,  $F = 0.49$ ,  $p = 0.69$ ). (e) Cumulative probability of gain of A1 L2/3 VIPs before and after sham exposure. Inset: Average gain of VIPs per mouse (60 neurons from 6 mice, 1-way repeated measure ANOVA,  $F = 0.44$ ,  $p = 0.61$ ). (f) Scatter plots of the gain of individual A1 L2/3 VIPs before and after sham exposure. Dotted line represents unity. Insets: Bar graphs representing number of neurons showing increased gain ( $\uparrow$  above unity) and reduced gain ( $\downarrow$  below unity) after NIHL. PreSE vs. SEday1:  $p = 0.01$ , PreSE vs. SEday3:  $p = 0.005$ , and PreSE vs. SEday10:  $p = 0.006$ ; permutation test. (g) Histograms showing percentage changes in the gain of L2/3 VIP neurons after noise (top) and sham (bottom) exposure.
